# Supplementary material for: Jinmaitong ameliorates diabetic peripheral neuropathy in streptozotocin-induced diabetic rats by modulating gut microbiota and neuregulin 1
Source: publisher site journal article supplement (doi:10.18632/aging.103750), 2020-09-13
Supplement: Supplementary file [file aging-v12i17-103750-supplementary-material-SD1.pdf]

## SUPPLEMENTARY FIGURE

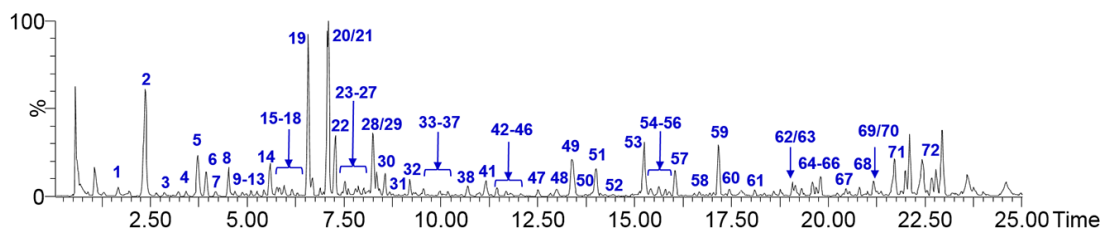

**Supplementary Figure 1. Base peak ion chromatogram of JMT in negative scan.** A figure from our previous published study using the same batch of JMT drug is provided for reference (W. Song et al., Jinmaitong, a Traditional Chinese Compound Prescription, Ameliorates the Streptozocin-Induced Diabetic Peripheral Neuropathy Rats by Increasing Sciatic Nerve IGF-1 and IGF-1R Expression, *Frontiers in Pharmacology* 10 (2019) 255. doi: 10.3389/fphar.2019.00255).
