# Supplementary material for: Jinmaitong ameliorates diabetic peripheral neuropathy in streptozotocin-induced diabetic rats by modulating gut microbiota and neuregulin 1
Source: publisher site journal article supplement (doi:10.18632/aging.103750), 2020-09-13
Supplement: Supplementary file [file aging-v12i17-103750-supplementary-material-SD4.pdf]

## SUPPLEMENTARY TABLE

**Supplementary Table 3. Detailed information of the antibodies used in this study.**

| <b>Name of Antibody</b>                                          | <b>Manufacture (Host)</b> | <b>Working Dilution</b> | <b>Applications</b> |
|------------------------------------------------------------------|---------------------------|-------------------------|---------------------|
| Contactin-associated protein 1 (Caspr)                           | Abcam (Rabbit)            | 1:500                   | IF                  |
| Amyloid precursor protein (App)                                  | Genetex (Rabbit)          | 1:500                   | IF                  |
| beta Tubulin 3 ( $\beta$ III-tubulin)                            | Genetex (Mouse)           | 1:500                   | IF                  |
| Protein gene product 9.5 (PGP 9.5)                               | Genetex (Rabbit)          | 1:200                   | IF                  |
| Alexa Fluor 488 goat anti-rabbit highly cross-adsorbed IgG (H+L) | Invitrogen (Goat)         | 1:200                   | IF                  |
| Alexa Fluor 594 goat anti-rabbit highly cross-adsorbed IgG (H+L) | Invitrogen (Goat)         | 1:200                   | IF                  |
| Alexa Fluor 594 goat anti-mouse highly cross-adsorbed IgG (H+L)  | Invitrogen (Goat)         | 1:200                   | IF                  |
