# Supplementary material for: Jinmaitong ameliorates diabetic peripheral neuropathy in streptozotocin-induced diabetic rats by modulating gut microbiota and neuregulin 1
Source: Aging (Albany NY). 2020 Sep 13;12(17):17436–58. doi: 10.18632/aging.103750 (PMC7521543; doi:10.18632/aging.103750)
Supplement: Supplementary Table 4 [file aging-12-103750-s001..xlsx]

## Sheet: genus_diff2_envir.estimate
Supplemental Table 4. Spearman’s correlation r-values between gut microbiota abundance and DPN phenotypes and serum NRG1 level.
Name	Body weight(g)	Non-fasting blood glucose(mmol/L)	Mechanical withdrawal thresholds(g)	IENFD(nerve fiber profiles/mm)	NRG1(pg/ml)
k__Bacteria;p__Bacteroidetes;c__Bacteroidia;o__Bacteroidales	-0.764348	0.589811	-0.36087	-0.326957	-0.497391
k__Bacteria;p__Bacteroidetes;c__Bacteroidia	-0.764348	0.589811	-0.36087	-0.326957	-0.497391
k__Bacteria;p__Proteobacteria;c__Gammaproteobacteria;o__Enterobacteriales;f__Enterobacteriaceae;g__Klebsiella	-0.567103	0.522997	-0.263396	-0.244157	-0.461745
k__Bacteria.p__Bacteroidetes.c__Bacteroidia.o__Bacteroidales.f__Porphyromonadaceae	-0.655652	0.584847	-0.52	-0.466957	-0.534783
k__Bacteria;p__Bacteroidetes;c__Bacteroidia;o__Bacteroidales;f__Prevotellaceae	-0.476522	0.450368	-0.287826	-0.270435	-0.384348
k__Bacteria;p__Firmicutes;c__Clostridia;o__Clostridiales;f__Lachnospiraceae;g__Coprococcus	-0.774174	0.620953	-0.382048	-0.367152	-0.616447
k__Bacteria;p__Bacteroidetes;c__Bacteroidia;o__Bacteroidales;f__Prevotellaceae;g__Prevotella	-0.60087	0.541976	-0.42087	-0.432174	-0.493043
k__Bacteria;p__Proteobacteria;c__Betaproteobacteria;o__Burkholderiales;f__Oxalobacteraceae	-0.554341	0.493135	-0.284128	-0.30702	-0.420581
k__Bacteria;p__Bacteroidetes	-0.764348	0.589811	-0.36087	-0.326957	-0.497391
k__Bacteria;p__Proteobacteria;c__Betaproteobacteria;o__Burkholderiales;f__Oxalobacteraceae;g__Oxalobacter	-0.554341	0.493135	-0.284128	-0.30702	-0.420581
k__Bacteria;p__Actinobacteria	0.588622	-0.770243	0.725096	0.704167	0.682802
k__Bacteria;p__Proteobacteria	0.529565	-0.575821	0.732174	0.717391	0.724348
k__Bacteria;p__Actinobacteria;c__Actinobacteria	0.588622	-0.770243	0.725096	0.704167	0.682802
k__Bacteria.p__Proteobacteria.c__Epsilonproteobacteria.o__Campylobacterales.f__Helicobacteraceae.g__Helicobacter	0.310435	-0.328976	0.50087	0.493913	0.565217
k__Bacteria.p__Proteobacteria.c__Betaproteobacteria.o__Burkholderiales	0.423799	-0.439417	0.343325	0.30615	0.439981
k__Bacteria.p__Proteobacteria.c__Betaproteobacteria	0.423799	-0.439417	0.343325	0.30615	0.439981
k__Bacteria.p__Proteobacteria.c__Epsilonproteobacteria.o__Campylobacterales.f__Helicobacteraceae	0.310435	-0.328976	0.50087	0.493913	0.565217
k__Bacteria.p__Proteobacteria.c__Epsilonproteobacteria	0.310435	-0.328976	0.50087	0.493913	0.565217
k__Bacteria.p__Proteobacteria.c__Epsilonproteobacteria.o__Campylobacterales	0.310435	-0.328976	0.50087	0.493913	0.565217
