# Supplementary material for: Jinmaitong ameliorates diabetic peripheral neuropathy in streptozotocin-induced diabetic rats by modulating gut microbiota and neuregulin 1
Source: Aging (Albany NY). 2020 Sep 13;12(17):17436–58. doi: 10.18632/aging.103750 (PMC7521543; doi:10.18632/aging.103750)
Supplement: Supplementary Table 5 [file aging-12-103750-s002..xlsx]

## Sheet: genus_diff2_envir.pvalue
Supplemental Table 5. Spearman’s correlation p-values between gut microbiota abundance and DPN phenotypes and serum NRG1 level.
Name	Body weight(g)	Non-fasting blood glucose(mmol/L)	Mechanical withdrawal thresholds(g)	IENFD(nerve fiber profiles/mm)	NRG1(pg/ml)
k__Bacteria;p__Bacteroidetes;c__Bacteroidia;o__Bacteroidales	2.19819e-05	0.00241779	0.0838674	0.119103	0.0144248
k__Bacteria;p__Bacteroidetes;c__Bacteroidia	2.19819e-05	0.00241779	0.0838674	0.119103	0.0144248
k__Bacteria;p__Proteobacteria;c__Gammaproteobacteria;o__Enterobacteriales;f__Enterobacteriaceae;g__Klebsiella	0.00385459	0.00873382	0.213651	0.250238	0.0231223
k__Bacteria.p__Bacteroidetes.c__Bacteroidia.o__Bacteroidales.f__Porphyromonadaceae	0.000681337	0.00268501	0.0101048	0.0225564	0.00791195
k__Bacteria;p__Bacteroidetes;c__Bacteroidia;o__Bacteroidales;f__Prevotellaceae	0.0196737	0.0272126	0.172193	0.200499	0.0645953
k__Bacteria;p__Firmicutes;c__Clostridia;o__Clostridiales;f__Lachnospiraceae;g__Coprococcus	9.03694e-06	0.00120354	0.0654265	0.0775834	0.00133732
k__Bacteria;p__Bacteroidetes;c__Bacteroidia;o__Bacteroidales;f__Prevotellaceae;g__Prevotella	0.00232012	0.00622468	0.0416782	0.0360882	0.0154097
k__Bacteria;p__Proteobacteria;c__Betaproteobacteria;o__Burkholderiales;f__Oxalobacteraceae	0.00493949	0.0143427	0.178445	0.144481	0.0407116
k__Bacteria;p__Bacteroidetes	2.19819e-05	0.00241779	0.0838674	0.119103	0.0144248
k__Bacteria;p__Proteobacteria;c__Betaproteobacteria;o__Burkholderiales;f__Oxalobacteraceae;g__Oxalobacter	0.00493949	0.0143427	0.178445	0.144481	0.0407116
k__Bacteria;p__Actinobacteria	0.00247961	1.07105e-05	6.1127e-05	0.000122853	0.000236412
k__Bacteria;p__Proteobacteria	0.0086351	0.00323528	7.43648e-05	0.000121561	9.69187e-05
k__Bacteria;p__Actinobacteria;c__Actinobacteria	0.00247961	1.07105e-05	6.1127e-05	0.000122853	0.000236412
k__Bacteria.p__Proteobacteria.c__Epsilonproteobacteria.o__Campylobacterales.f__Helicobacteraceae.g__Helicobacter	0.139795	0.116492	0.0136749	0.0152084	0.00462877
k__Bacteria.p__Proteobacteria.c__Betaproteobacteria.o__Burkholderiales	0.0390397	0.0316794	0.100482	0.14568	0.0314357
k__Bacteria.p__Proteobacteria.c__Betaproteobacteria	0.0390397	0.0316794	0.100482	0.14568	0.0314357
k__Bacteria.p__Proteobacteria.c__Epsilonproteobacteria.o__Campylobacterales.f__Helicobacteraceae	0.139795	0.116492	0.0136749	0.0152084	0.00462877
k__Bacteria.p__Proteobacteria.c__Epsilonproteobacteria	0.139795	0.116492	0.0136749	0.0152084	0.00462877
k__Bacteria.p__Proteobacteria.c__Epsilonproteobacteria.o__Campylobacterales	0.139795	0.116492	0.0136749	0.0152084	0.00462877
